# Supplementary material for: Finding Novel Molecular Connections between Developmental Processes and Disease
Source: PubMed Central journal article supplement (PMC4038461; doi:10.1371/journal.pcbi.1003578), 2014-05-29
Supplement: pcbi.1003578.s001.pdf [file pcbi.1003578.s001.pdf]

**List of 26 top-level categories in the MeSH disease (C) forest**

| MeSH Index | Disease Name                                                    |
|------------|-----------------------------------------------------------------|
| C01        | Bacterial Infections and Mycoses                                |
| C02        | Virus Diseases                                                  |
| C03        | Parasitic Diseases                                              |
| C04        | Neoplasms                                                       |
| C05        | Musculoskeletal Diseases                                        |
| C06        | Digestive System Diseases                                       |
| C07        | Stomatognathic Diseases                                         |
| C08        | Respiratory Tract Diseases                                      |
| C09        | Otorhinolaryngologic Diseases                                   |
| C10        | Nervous System Diseases                                         |
| C11        | Eye Diseases                                                    |
| C12        | Male Urogenital Diseases                                        |
| C13        | Female Urogenital Diseases and Pregnancy Complications          |
| C14        | Cardiovascular Diseases                                         |
| C15        | Hemic and Lymphatic Diseases                                    |
| C16        | Congenital, Hereditary, and Neonatal Diseases and Abnormalities |
| C17        | Skin and Connective Tissue Diseases                             |
| C18        | Nutritional and Metabolic Diseases                              |
| C19        | Endocrine System Diseases                                       |
| C20        | Immune System Diseases                                          |
| C21        | Disorders of Environmental Origin                               |
| C22        | Animal Diseases                                                 |
| C23        | Pathological Conditions, Signs and Symptoms                     |
| C24        | Occupational Diseases                                           |
| C25        | Chemically-Induced Disorders                                    |
| C26        | Wounds and Injuries                                             |
